# Supplementary material for: A Ni(OH)2–PtO2 hybrid nanosheet array with ultralow Pt loading toward efficient and durable alkaline hydrogen evolution
Source: Royal Society of Chemistry journal article supplement (doi:10.1039/c7ta09990h), 2018-01-01
Supplement: c7ta09990h1.pdf [file c7ta09990h1.pdf]

## Electronic Supplementary Information

### Experimental Section

**Materials:**  $\text{NH}_4\text{F}$  and urea were bought from Beijing Chemical Works.  $\text{Ni}(\text{NO}_3)_2 \cdot 6\text{H}_2\text{O}$  and  $\text{H}_2\text{PtCl}_6 \cdot 6\text{H}_2\text{O}$  were purchased from Aladdin Ltd. (Shanghai, China). Pt/C (20 wt% Pt) was provided by Alfa Aesar (China) Chem. Co. Ltd. Nafion (5 wt%) was bought from Sigma-Aldrich Chemical Reagent Co., Ltd. All reagents were used as received without further purification. Ti mesh was purchased from Phychemi Hong Kong Company Limited. Pure water was utilized to prepare all solutions.

**Preparation of  $\text{Ni}(\text{OH})_2$  NS/Ti:** We chose Ti mesh as the substrate due to its excellent chemical and electrochemical stability, acceptable electronic conductivity, open structure and ease of fabrication into electrodes.<sup>1</sup> Ti mesh was cleaned by sonication sequentially in concentrated HCl, ethanol and water for several times to remove the surface impurities.  $\text{Ni}(\text{OH})_2$  NS/Ti was made as follows. In brief, 1.308 g  $\text{Ni}(\text{NO}_3)_2 \cdot 6\text{H}_2\text{O}$ , 1.201 g urea, and 0.296 g  $\text{NH}_4\text{F}$  were dissolved in 80 mL ultrapure water. Then the mixture solution and the pre-treated Ti mesh (2 cm  $\times$  3 cm) were transferred into a 100 mL Teflon-lined stainless-steel autoclave and maintained at 373 K for 6 h. After the autoclave cooled down naturally, the resulting  $\text{Ni}(\text{OH})_2$  NS/Ti was taken out and washed with ultrapure water. The loading of  $\text{Ni}(\text{OH})_2$  on Ti mesh is 1.49 mg  $\text{cm}^{-2}$ .

**Preparation of  $\text{Ni}(\text{OH})_2$ - $\text{PtO}_2$  NS/Ti:**  $\text{Ni}(\text{OH})_2$ - $\text{PtO}_2$  NS/Ti was prepared as follows.  $\text{H}_2\text{PtCl}_6 \cdot 6\text{H}_2\text{O}$  (2 mg) was dissolved in 25 mL water under vigorous stirring for 5 min.  $\text{Ni}(\text{OH})_2$  NS/Ti and  $\text{H}_2\text{PtCl}_6 \cdot 6\text{H}_2\text{O}$  aqueous solution were all transferred into a 50 mL Teflon-lined stainless autoclave and maintained at 373 K for 4 h. After cooled down to room the temperature, the  $\text{Ni}(\text{OH})_2$ - $\text{PtO}_2$  NS/Ti was taken out and washed with ultrapure water thoroughly before vacuum dried. The loading of  $\text{Ni}(\text{OH})_2$ - $\text{PtO}_2$  on Ti mesh is 1.48 mg  $\text{cm}^{-2}$ .

**Preparation of PtO<sub>2</sub>/Ti:** H<sub>2</sub>PtCl<sub>6</sub>·6H<sub>2</sub>O (70 mmol) was dissolved in ultrapure water (30 mL). Then this pale yellow solution was transferred into a 50 mL Teflon-lined stainless-steel autoclave, which was sealed and maintained at 453 K for 24 h. After the sample cooled down to ambient temperature, PtO<sub>2</sub> was collected by centrifugation and washed with ultrapure water. To prepare PtO<sub>2</sub> loaded electrode, 20 mg PtO<sub>2</sub> and 10 μL 5 wt% Nafion solution were dispersed in 1 mL 1:1 v water/ethanol solvent by 30-min sonication to form an ink finally. Then 74 μL catalyst ink was loaded on Ti mesh with a catalyst loading of 1.48 mg cm<sup>-2</sup>.

**Characterizations:** XRD data was performed using a LabX XRD-6100 X-ray diffractometer Cu Kα radiation (40 kV, 30 mA) of wavelength 0.154 nm (SHIMADZU, Japan). SEM images were collected from the tungsten lamp-equipped SU3500 scanning electron microscope at an accelerating voltage of 20 kV (HITACHI, Japan). TEM images were collected on a Zeiss Libra 200FE transmission electron microscope operated at 200 kV. XPS measurements were performed using an ESCALABMK II X-ray photoelectron spectrometer with the exciting source of Mg. The ICP-MS analysis was performed on ThermoScientific iCAP6300.

**Electrochemical measurements:** All electrochemical measurements were performed with a CHI 660E electrochemical analyzer (Chenhua, Shanghai) in a conventional three electrode system, using Ni(OH)<sub>2</sub>-PtO<sub>2</sub> NS/Ti as working electrode, a graphite rod as counter electrode and Hg/HgO as reference electrode. Polarization curves were obtained using LSV with a scan rate of 5 mV s<sup>-1</sup> and no activation was used before recording the polarization curves. Given that as-measured reaction currents do not directly reflect the intrinsic behavior of catalysts due to the effect of ohmic resistance, an *iR* correction was applied to all LSV curves for further analysis, and all potentials were reported on a reversible hydrogen electrode (RHE) scale unless specifically stated. The potentials were calibrated to RHE, using the following equation: E (RHE) = E (Hg/HgO) + (0.098 + 0.059 pH) V.

**Calculation details:** Spin-polarized density functional theory calculations were performed using the Vienna ab initio simulation package (VASP).<sup>2-4</sup> We used the PBE functional for the exchange-correlation energy<sup>5</sup> and projector augmented wave (PAW)

potentials.<sup>6,7</sup> The kinetic energy cutoff was set to 450 eV. The ionic relaxation was performed until the force on each atom is less than 0.02 eV/Å. The k-points meshes were  $6 \times 6 \times 1$  with Monkhorst-Pack method.<sup>8</sup> The simulations were performed based on a PtO<sub>2</sub>(111) slab model, a Ni(OH)<sub>2</sub>(001) slab model and Ni(OH)<sub>2</sub>/PtO<sub>2</sub> interface with one PtO<sub>2</sub> unit on the Ni(OH)<sub>2</sub> substrate. To minimize the undesired interactions between images, a vacuum of at least 10 Å was considered along the z axis. The climbing image nudged elastic band (CNEB)<sup>9</sup> method was used to examine the energy profiles along selected pathways for H<sub>2</sub>O dissociation.

The  $\Delta G_{H^*}$  was calculated as follows, which is proposed by Norskov and coworkers<sup>10</sup>:

$$\Delta G_{H^*} = E_{\text{total}} - E_{\text{sur}} - E_{H^2}/2 + \Delta E_{\text{ZPE}} - T\Delta S$$

where  $E_{\text{total}}$  is the total energy for the adsorption state,  $E_{\text{sur}}$  is the energy of pure surface,  $E_{H^2}$  is the energy of H<sub>2</sub> in gas phase,  $\Delta E_{\text{ZPE}}$  is the zero-point energy change and  $\Delta S$  is the entropy change.

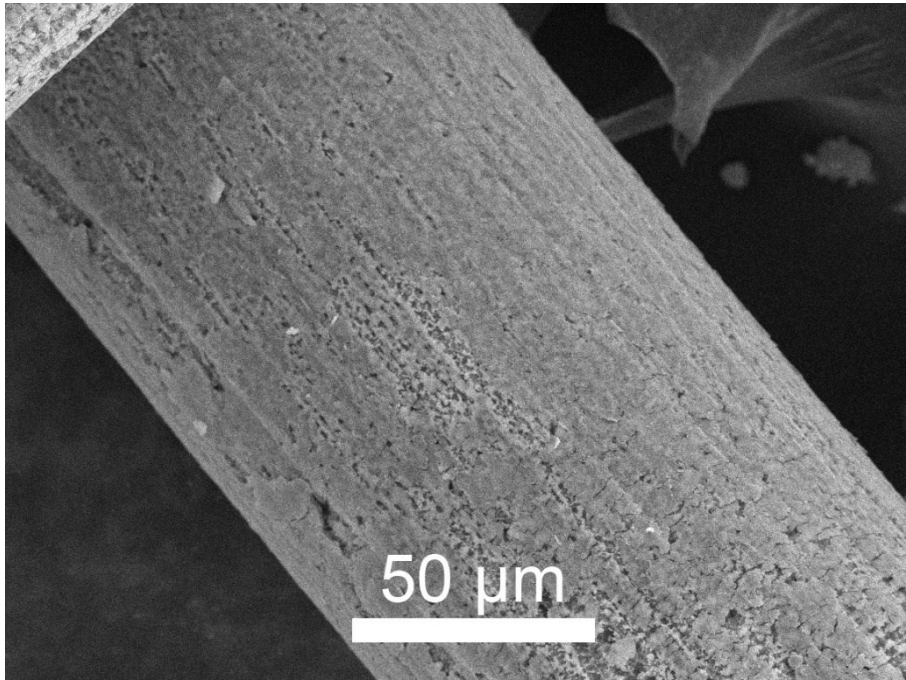

**Fig. S1.** SEM image of bare Ti mesh.

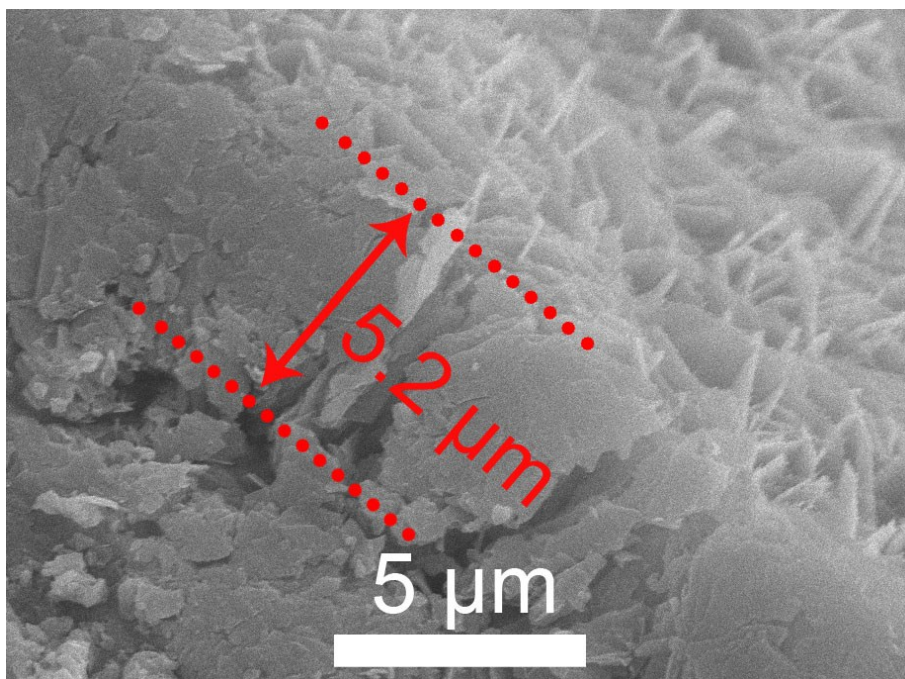

**Fig. S2.** Cross-section SEM image of Ni(OH)<sub>2</sub>-PtO<sub>2</sub> NS/Ti.

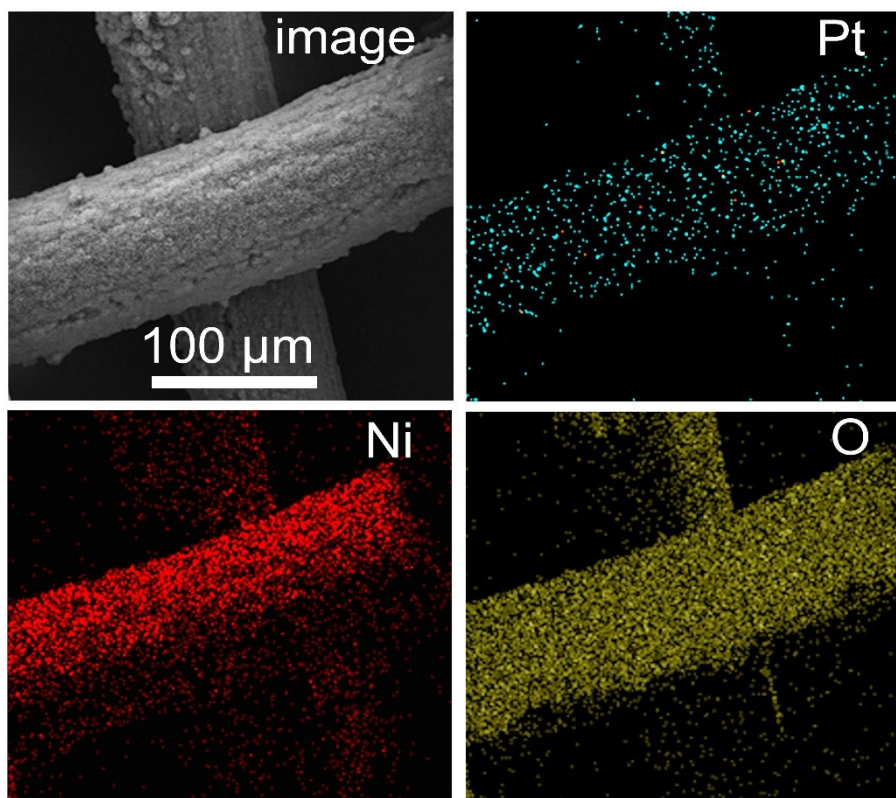

**Fig. S3.** SEM and EDX elemental mapping images of Pt, Ni and O for Ni(OH)<sub>2</sub>-PtO<sub>2</sub> NS/Ti.

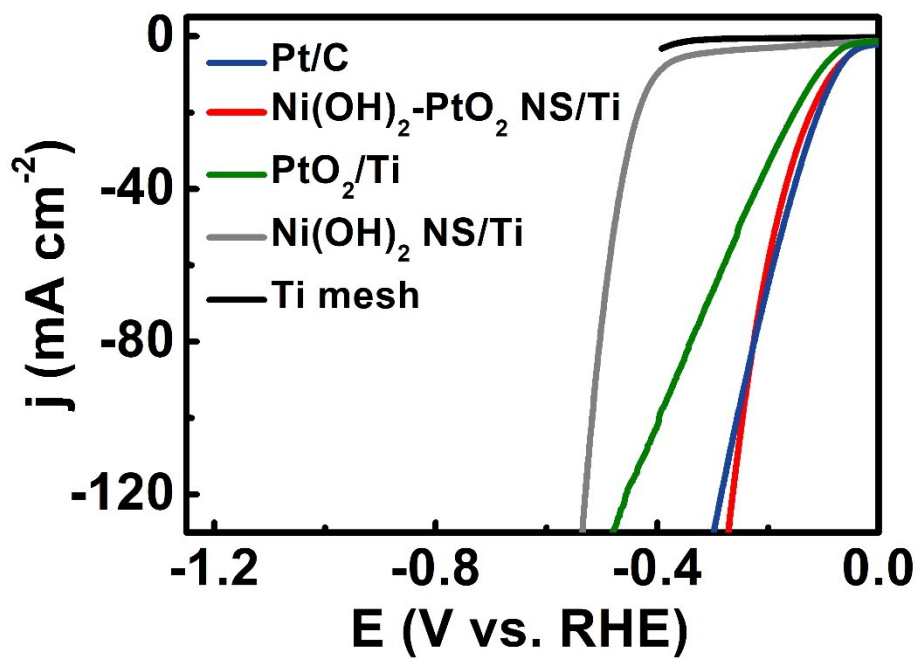

**Fig. S4.** LSV curves for bare Ti mesh, Ni(OH)<sub>2</sub> NS/Ti, Ni(OH)<sub>2</sub>-PtO<sub>2</sub> NS/Ti, PtO<sub>2</sub>/Ti, and Pt/C on Ti mesh with a scan rate of 5 mV s<sup>-1</sup> for the HER in 1.0 M KOH.

**Table S1.** Comparison of HER performance for Ni(OH)<sub>2</sub>-PtO<sub>2</sub> NS/Ti with other Pt-based electrocatalysts in alkaline media.

| Catalyst                                            | j<br>(mA cm <sup>-2</sup> ) | $\eta$<br>(mV) | Pt content<br>(wt%) | Electrolyte       | Ref.      |
|-----------------------------------------------------|-----------------------------|----------------|---------------------|-------------------|-----------|
| Ni(OH) <sub>2</sub> -PtO <sub>2</sub> NS/Ti         | 4                           | 31.4           | 5.1                 | 0.1 M KOH         | This work |
|                                                     |                             | 44.8           |                     | 1.0 M KOH         |           |
| Pt NWs/SL-<br>Ni(OH) <sub>2</sub>                   | 4                           | 57             | 38                  | 0.1 M KOH         | 11        |
|                                                     |                             | 85             |                     | 1.0 M KOH         |           |
| Pt(110)/Ni(OH) <sub>2</sub>                         | 4                           | 110            | Pt electrode        | 0.1 M KOH         | 12        |
| Pt <sub>3</sub> Ni<br>frames/Ni(OH) <sub>2</sub> /C | 4                           | 59             | 20                  | 0.1 M KOH         | 13        |
| Pt-Ni/C                                             | 4                           | 40             | 25                  | 0.1 M KOH         | 14        |
| PtCuNi/CNF@CF                                       | 4                           | 145            | 1.8                 | 1.0 M KOH         | 15        |
| Ni <sub>3</sub> N/Pt                                | 4                           | 37             | 15                  | 1.0 M KOH         | 16        |
| <i>hcp</i> -Pt-Ni                                   | 4                           | 45             | 39.6                | 0.1 M KOH         | 17        |
| Pt <sub>3</sub> Ni <sub>2</sub> NWs-S/C             | 4                           | 60             | 81.6                | 0.1 M KOH         | 18        |
| Pt(111)-Co(OH) <sub>2</sub>                         | 3                           | 196            | Pt electrode        | 0.1 M<br>KOH/LiOH | 19        |
| Pt@2D-Ni(OH) <sub>2</sub>                           | 4                           | 87             | 43                  | 0.1 M KOH         | 20        |
| Ni(OH) <sub>2</sub> /Pt                             | 5                           | 75             | Pt electrode        | 0.1 KOH           | 21        |



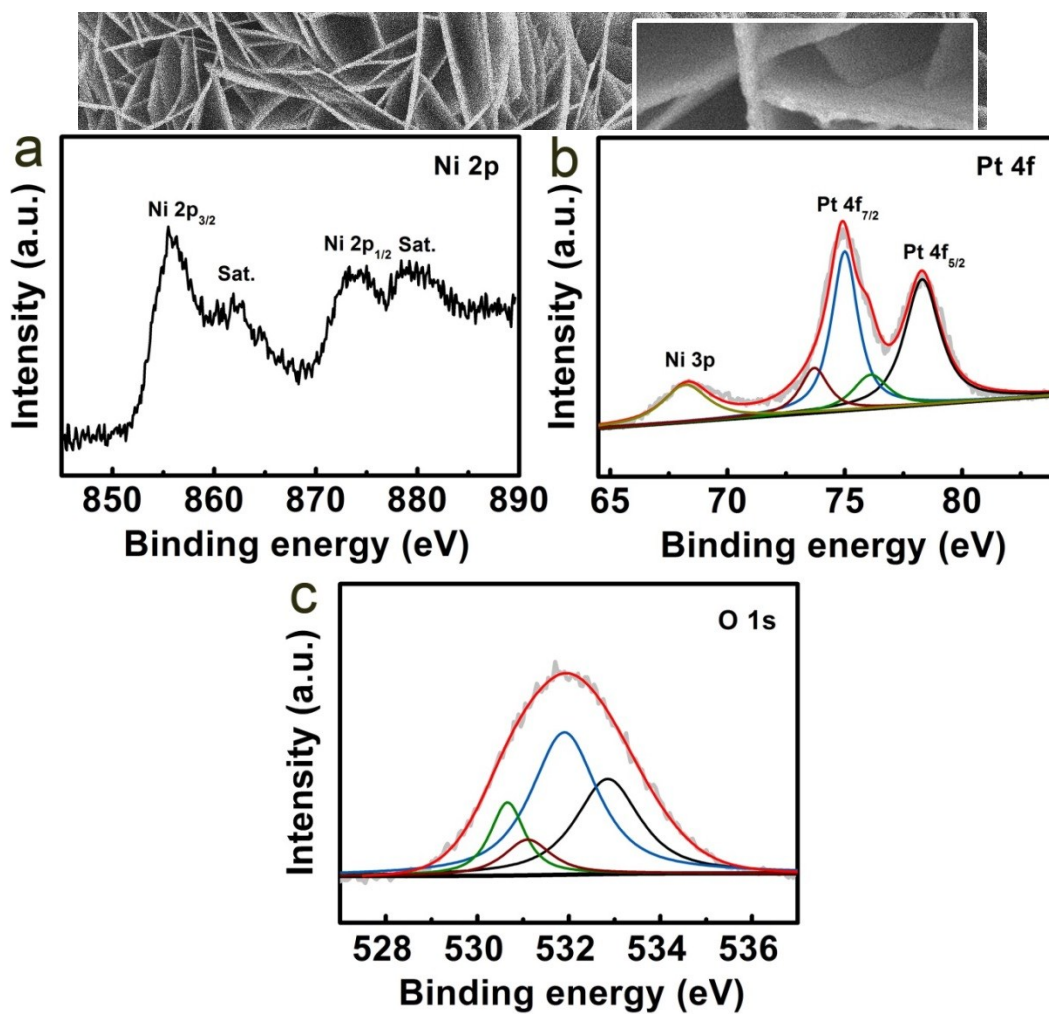

**Fig. S5.** SEM images of Ni(OH)<sub>2</sub>-PtO<sub>2</sub> NS/Ti after HER electrolysis in 0.1 M KOH.

**Fig. S6.** XPS spectra in the (a) Ni 2p, (b) Pt 4f and (c) O 1s regions for Ni(OH)<sub>2</sub>-PtO<sub>2</sub> after HER electrolysis in 0.1 M KOH.

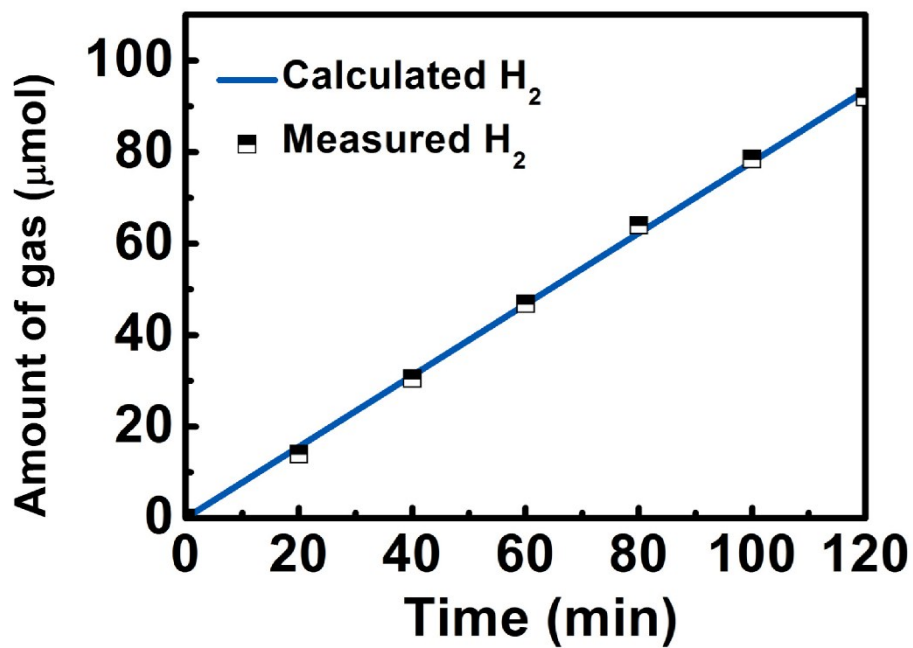

**Fig. S7.** The amount of gas theoretically calculated and experimentally measured vs. time for Ni(OH)<sub>2</sub>-PtO<sub>2</sub> NS/Ti in 0.1 M KOH.

## References

- 1 H. Cheng and K. Scott, *J. Appl. Electrochem.*, 2006, **36**, 1361-1366.
- 2 G. Kresse and J. Furthmuller, *Comp. Mater. Sci.*, 1996, **6**, 15-50.
- 3 G. Kresse and J. Furthmuller, *Phys. Rev. B*, 1996, **54**, 11169-11186.
- 4 G. Kresse and J. Hafner, *Phys. Rev. B*, 1994, **49**, 14251-14269.
- 5 J. P. Perdew, K. Burke and M. Ernzerhof, *Phys. Rev. Lett.*, 1996, **77**, 3865-3868.
- 6 G. Kresse and D. Joubert, *Phys. Rev. B*, 1999, **59**, 1758-1775.
- 7 P. E. Blochl, *Phys. Rev. B*, 1994, **50**, 17953-17979.
- 8 H. J. Monkhorst and J. D. Pack, *Phys. Rev. B*, 1976, **13**, 5188-5192.
- 9 G. Henkelman, B. P. Uberuaga and H. J. Jónsson, *Chem. Phys.* 2000, **113**, 9901-9904.
- 10 J. K. Nøskov, T. Bligaard, A. Logadottir, I. R. Kitchin, J. G. Chen, S. Pandalov and U. Stimming, *J. Electrochem. Soc.*, 2005, **152**, J23-J26.
- 11 H. Yin, S. Zhao, K. Zhao, A. Muqsit, H. Tang, L. Chang, H. Zhao, Y. Gao and Z. Tang, *Nat. Commun.*, 2015, **6**, 6430.
- 12 R. Subbaraman, D. Tripkovic, D. Strmcnik, K. C. Chang, M. Uchimura, A. P. Paulikas, V. Stamenkovic and N. M. Markovic, *Science*, 2017, **8**, 1256-1260.
- 13 C. Chen, Y. Kang, Z. Huo, Z. Zhu, W. Huang, H. L. Xin, J. D. Snyder, D. Li, J. A. Herron, M. Mavrikakis, M. Chi. K. L. More, Y. Li, N. M. Markovic, G. A. Somorjai, P. Yang and V. R. Stamenkovic, *Science*, 2014, **343**, 1339-1343.
- 14 R. Kaviani, S. I. Choi, J. Park, T. Liu, H. C. Peng, N. Lu, J. Wang, M. J. Kim, Y. Xia and S. W. Lee, *J. Mater. Chem. A*, 2016, **4**, 12392-12397.
- 15 Y. Shen, A. C. Lua, J. Xi and X. Qiu, *ACS Appl. Mater. Interfaces*, 2016, **8**, 3464-3472.
- 16 Y. Wang, L. Chen, X. Yu, Y. Wang, and G. Zheng, *Adv. Energy Mater.*, 2017, **7**, 1601390.
- 17 Z. Cao, Q. Chen, J. Zhang, H. Li, Y. Jiang, S. Shen, G. Fu, B. Lu, Z. Xie and L. Zheng, *Nat. Commun.*, 2017, **8**, 15131.

- 18 P. Wang, X. Zhang, J. Zhang, S. Wan, S. Guo, G. Lu, J. Yao and X. Huang, *Nat. Commun.*, 2017, **8**, 14580.
- 19 R. Subbaraman, D. Tripkovic, K.-C. Chang, D. Strmcnik, A. P. Paulikas, P. Hirunsit, M. Chan, J. P. Greeley, V. R. Stamenkovic and N. M. Markovic, *Nat. Mater.*, 2012, **11**, 550-557.
- 20 L. Wang, Y. Zhu, Z. Zeng, C. Lin, M. Giroux, L. Jiang, Y. Han, J. Greeley, C. Wang and J. Jin, *Nano Energy*, 2017, **31**, 456-461.
- 21 N. Danilovic, R. Subbaraman, D. Strmcnik, K. C. Chang, A. P. Paulikas, V. R. Stamenkovic and N. M. Markovic, *Angew. Chem., Int. Ed.*, 2012, **51**, 12495-12498.
